# Supplementary material for: Inducible CCR2+ nonclassical monocytes mediate the regression of cancer metastasis
Source: JCI journal article supplement (doi:10.1172/jci179527), 2024-10-01
Supplement: sd1 [file 1]

301 Moved Permanently

# Moved Permanently

The document has moved here.
